# Supplementary material
Source: PubMed Central journal article supplement (PMC8796055)
Supplement: jama-e220204-s001.pdf [file jama-e220204-s001.pdf]

## Supplemental Online Content

Kurihara C, Manerikar A, Querrey M, et al. Clinical characteristics and outcomes of patients with COVID-19–associated acute respiratory distress syndrome who underwent lung transplant at an academic medical center in the US. *JAMA*.  
doi:10.1001/jama.2022.0204

### **eMethods**

**eFigure 1.** Karnofsky Performance Status for COVID-19 and non-COVID-19 Patients Pre- and Post- Lung Transplant

**eFigure 2.** Cumulative Curve Showing Dates of All Lung Transplants Performed From January 2020 Through September 2021

**eTable 1.** Clinical Profile of Patients With COVID-19-Associated ARDS on ECMO Support for Greater Than 28 Days

**eTable 2.** Patient Characteristics, Intra-operative and Post-operative Findings of COVID-19-Associated ARDS Lung Transplant Recipients

### **eReferences**

This supplemental material has been provided by the authors to give readers additional information about their work.

## eMethods

### Lung transplantation

All patients with COVID-19 received treatment according to the institutional standard of care from a multidisciplinary care team that included surgeons, infectious disease physicians, pulmonary and critical care physicians, and cardiologists. Each COVID-19 patient was treated by the multidisciplinary care team over the entire duration of the illness before being considered for transplantation. Referral for lung transplantation was made when there was no longitudinal evidence of lung recovery as agreed by the multidisciplinary team. Lung transplant evaluation was performed according to the International Society for Heart and Lung Transplantation guidelines<sup>1, 2</sup>. The broad transplant criteria for patients with CCAA included: Age  $\leq 70$  years old; negative SARS-CoV-2 PCR by two consecutive lower respiratory fluid, either tracheal aspirate or bronchoalveolar lavage, collected 24 hours apart; single organ failure; no evidence of irrecoverable brain damage<sup>3</sup>, and body mass index  $\leq 35$ , which was similar to the non-COVID-19 patients. Those being considered for multiorgan transplantation were excluded for the purposes of this study. Donation after cardiac death or ex vivo lung perfusion (EVLP) were not utilized.

Details of the transplant management for patients in this series are provided in a prior report<sup>3</sup>. Briefly, COVID-19 ARDS patients underwent double lung transplant using an approach of central veno-arterial ECMO. All patients received the same immunosuppression and post-operative management. Induction immunosuppression included methylprednisolone 500mg and basiliximab 20mg intraoperatively. Additionally, a second dose of basiliximab was administered on post-operative day 4. The maintenance immunosuppression included prednisone (0.5mg/kg daily), mycophenolate mofetil (1000mg twice a day) and tacrolimus (0.015mg/kg total daily to target drug levels between 8-12 ng/ml). All patients received standard protocol driven infection prophylaxis after lung transplantation. Following the acute hospitalization, the patients were considered for inpatient rehabilitation.

### ECMO management

Patients with respiratory failure were considered for ECMO if they had refractory hypoxemia (PaO<sub>2</sub><55 mmHg, pulse oximetry oxygen saturations <88%, pH<7.2, despite lung protective mechanical ventilation with plateau pressure < 35, neuromuscular blockade, and prone ventilation as indicated, in accordance with recommendations from the Extracorporeal Life Support Organization (ELSO, [www.elseo.org](http://www.elseo.org)). The decision to initiate ECMO was made by a multidisciplinary ECMO team including pulmonologists, thoracic surgeons, ECMO specialists, and intensivists, using a teleconference line. Different cannulation strategies were used [Internal jugular vein – femoral vein cannulation or predominantly right internal jugular ProtekDuo® cannulation (LivaNova Inc., Pittsburgh, PA, USA)]. The VV-ECMO circuit included Quadrox iD adult (7.0) oxygenator (MAQUET Holding B.V. & Co. KG, Germany) and Rotaflow pump (MAQUET Holding B.V. & Co. KG, Germany). Patients did not receive continuous anticoagulation unless there was clinical and/or radiological evidence of a thrombotic event that warranted its use (eg, DVT, PE, arterial thrombosis). ECMO flow was maintained at least 3.0L/min, consistent with recent reports demonstrating the feasibility of using VV-ECMO without anticoagulation<sup>4-6</sup>. Patient received unfractionated heparin (5,000 U given subcutaneously every 8 hours) for deep venous thrombosis prophylaxis. Thresholds for packed red blood cell transfusion included hemoglobin <7 g/dL or hemodynamic instability in the setting of active blood loss. Platelet transfusion was recommended for platelet counts <50,000/mL, Coagulopathy (INR>2) in the setting of active bleeding was treated with fresh frozen plasma with or without procoagulant factors such as cryoprecipitate.

**eFigure 1.** Karnofsky Performance Status for COVID-19 and non-COVID-19 Patients Pre- and Post- Lung Transplant

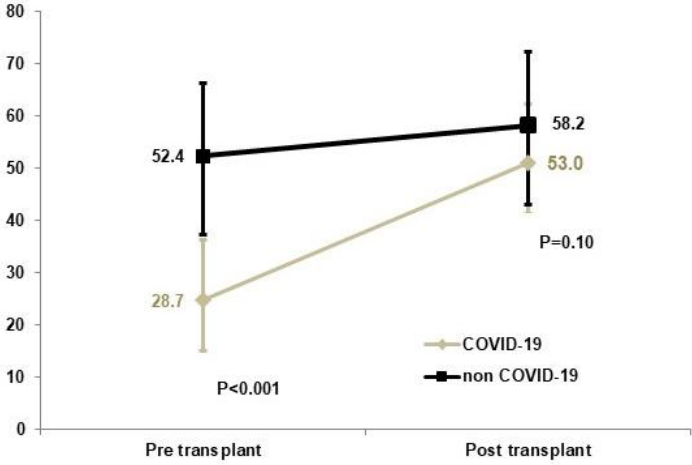

**eFigure 2.** Cumulative Curve Showing Dates of All Lung Transplants Performed From January 2020 Through September 2021

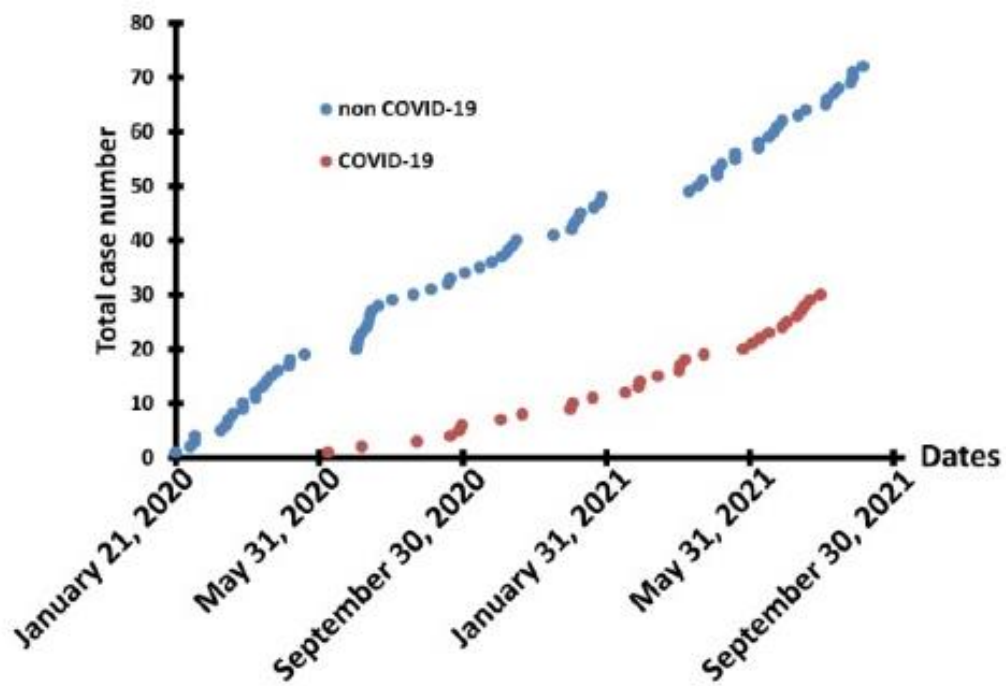

**eTable 1.** Clinical Profile of Patients With COVID-19-Associated ARDS on ECMO Support for Greater Than 28 Days.

| Variable                              | Received Lung Transplant (n=17) | Did Not Receive Lung Transplant (n=32) |
|---------------------------------------|---------------------------------|----------------------------------------|
| Age, median (IQR), y                  | 53 (36-59)                      | 52 (45-57)                             |
| Women                                 | 7 (41.2%)                       | 11 (34.4%)                             |
| Men                                   | 10 (58.8%)                      | 21 (65.6%)                             |
| BMI, kg/m <sup>2</sup>                | 27.1 ± 3.9                      | 32.1 ± 4.9                             |
| History of smoking                    | 0 (0%)                          | 2 (6.3%)                               |
| Hypertension                          | 9 (52.9%)                       | 7 (21.9%)                              |
| Diabetes                              | 5 (29.4%)                       | 6 (18.8%)                              |
| CKD                                   | 0 (0%)                          | 1 (3.1%)                               |
| Dialysis                              | 2 (11.8%)                       | 0 (0%)                                 |
| Chronic Obstructive Pulmonary Disease | 0 (0%)                          | 0 (0%)                                 |
| <b>Laboratory</b>                     |                                 |                                        |
| Hemoglobin, g/dL                      | 7.7 ± 1                         | 11.7 ± 2                               |
| WBC, 1,000/mm <sup>3</sup>            | 12 ± 4.8                        | 13.2 ± 6.1                             |
| Platelets, 1,000/mm <sup>3</sup>      | 180.5 ± 63.8                    | 224.4 ± 110.2                          |
| Sodium, mEq/L                         | 142.1 ± 4.4                     | 137.8 ± 4.6                            |
| Creatinine, mg/dL                     | 0.6 ± 0.3                       | 1.5 ± 3.7                              |
| BUN, mg/dL                            | 26.5 ± 14.7                     | 24.2 ± 12.1                            |
| AST, U/L                              | 22.9 ± 18.7                     | 60.6 ± 72.2                            |
| ALT, U/L                              | 31.2 ± 22.2                     | 109.5 ± 253.3                          |
| Total bilirubin, mg/dL                | 1.3 ± 1.6                       | 0.6 ± 0.3                              |
| Albumin, g/dL                         | 3.3 ± 0.7                       | 2.9 ± 0.5                              |
| INR                                   | 1.2 ± 0.1                       | 1.1 ± 0.2                              |
| <b>ABG (at cannulation)</b>           |                                 |                                        |
| pH                                    | 7.43 ± 0.1                      | 7.34 ± 0.1                             |
| PaCO <sub>2</sub>                     | 47.3 ± 10.8                     | 58.6 ± 16.3                            |
| PaO <sub>2</sub>                      | 153.2 ± 76.4                    | 91.6 ± 51.2                            |
| HCO <sub>3</sub>                      | 30.8 ± 6                        | 31.6 ± 8.4                             |

Continuous data are shown as means ± standard deviation (SD). BMI, body mass index; BSA, body surface area; CKD, chronic kidney disease (Defined using estimated glomerular filtration rate is less than 60 mL/min); WBC, white blood cell; BUN, blood urea nitrogen; AST, aspartate aminotransferase; ALT, Alanine aminotransferase; INR, international normalized ratio

**eTable 2.** Patient Characteristics, Intra-operative and Post-operative Findings of COVID-19-Associated ARDS Lung Transplant Recipients

| Variable   | Age Decade | BMI  | Sex    | Onset to lung Tx (days) | ICU stay | Ventilator days | Pleural drainage | Post-Op ECMO | Hospital stay | PGD grade1-3 | OR time (hours) | Ischemic Time | Intra-Op RBC | Intra-Op FFP | Intra-Op Plt |
|------------|------------|------|--------|-------------------------|----------|-----------------|------------------|--------------|---------------|--------------|-----------------|---------------|--------------|--------------|--------------|
| Patient 1  | 20s        | 31.5 | Female | 40                      | 21       | 17              | 14               | 17           | 33            | YES          | 8.3             | 5.3           | 6            | 2            | 3            |
| Patient 2  | 60s        | 23.4 | Male   | 114                     | 15       | 1               | 24               | 9            | 38            | YES          | 9.5             | 5.0           | 10           | 6            | 1            |
| Patient 3  | 40s        | 20.7 | Male   | 91                      | 4        | 20              | 23               | 8            | 37            | YES          | 10.8            | 5.1           | 16           | 8            | 4            |
| Patient 4  | 60s        | 25.8 | Male   | 49                      | 28       | 4               | 61               | 0            | 92            | NO           | 9.3             | 6.0           | 10           | 2            | 2            |
| Patient 5  | 50s        | 24.5 | Male   | 65                      | 33       | 18              | 20               | 5            | 58            | YES          | 9.2             | 5.3           | 5            | 0            | 0            |
| Patient 6  | 40s        | 35.7 | Female | 75                      | 16       | 1               | 13               | 0            | 50            | NO           | 10.3            | 4.4           | 10           | 0            | 3            |
| Patient 7  | 30s        | 30.2 | Female | 87                      | 41       | 17              | 31               | 0            | 47            | YES          | 10.0            | 6.0           | 14           | 4            | 2            |
| Patient 8  | 60s        | 27.6 | Male   | 143                     | 23       | 16              | 17               | 4            | 28            | YES          | 11.1            | 8.1           | 19           | 8            | 2            |
| Patient 9  | 60s        | 26.8 | Male   | 89                      | 25       | 4               | 29               | 4            | 29            | YES          | 9.6             | 5.6           | 5            | 1            | 0            |
| Patient 10 | 60s        | 20.8 | Male   | 314                     | 18       | 1               | 13               | 0            | 17            | YES          | 7.3             | 5.6           | 2            | 0            | 0            |
| Patient 11 | 20s        | 26.6 | Female | 87                      | 12       | 12              | 15               | 1            | 17            | NO           | 8.3             | 4.9           | 7            | 1            | 1            |
| Patient 12 | 60s        | 19.0 | Male   | 300                     | 39       | 27              | 39               | 0            | 39            | YES          | 8.0             | 5.7           | 7            | 0            | 0            |
| Patient 13 | 50s        | 21.7 | Male   | 90                      | 20       | 3               | 20               | 0            | 36            | NO           | 9.8             | 7.0           | 18           | 11           | 8            |
| Patient 14 | 40s        | 37.2 | Male   | 252                     | 15       | 21              | 19               | 0            | 29            | YES          | 8.2             | 5.9           | 0            | 0            | 0            |
| Patient 15 | 60s        | 24.4 | Female | 170                     | 7        | 3               | 14               | 0            | 19            | NO           | 9.8             | 4.8           | 6            | 0            | 0            |
| Patient 16 | 20s        | 26.7 | Female | 164                     | 33       | 29              | 25               | 1            | 35            | YES          | 8.2             | 6.0           | 7            | 0            | 1            |
| Patient 17 | 50s        | 28.6 | Male   | 116                     | 12       | 9               | 21               | 0            | 22            | YES          | 11.0            | 6.3           | 17           | 6            | 3            |
| Patient 18 | 50s        | 19.5 | Male   | 169                     | 14       | 13              | 17               | 0            | 17            | YES          | 8.1             | 5.4           | 2            | 0            | 0            |
| Patient 19 | 50s        | 28.3 | Female | 92                      | 19       | 0               | 32               | 0            | 35            | YES          | 10.8            | 6.1           | 16           | 4            | 2            |
| Patient 20 | 50s        | 21.5 | Female | 170                     | 18       | 18              | 18               | 0            | 18            | YES          | 9.1             | 6.5           | 17           | 12           | 5            |
| Patient 21 | 40s        | 25.6 | Female | 199                     | 10       | 3               | 10               | 0            | 10            | YES          | 8.0             | 5.9           | 3            | 0            | 0            |
| Patient 22 | 60s        | 29.2 | Male   | 175                     | 12       | 1               | 19               | 0            | 21            | NO           | 7.6             | 6.6           | 0            | 0            | 0            |
| Patient 23 | 50s        | 20.7 | Male   | 126                     | 9        | 1               | 10               | 0            | 13            | NO           | 8.7             | 6.1           | 2            | 0            | 0            |
| Patient 24 | 30s        | 26.6 | Male   | 43                      | 21       | 15              | 19               | 8            | 25            | YES          | 9.1             | 5.8           | 9            | 1            | 2            |
| Patient 25 | 40s        | 27.1 | Male   | 75                      | 7        | 1               | 10               | 0            | 13            | NO           | 8.0             | 5.8           | 0            | 0            | 0            |
| Patient 26 | 50s        | 29.9 | Female | 239                     | 69       | 20              | 44               | 0            | 69            | YES          | 7.1             | 4.7           | 2            | 5            | 0            |
| Patient 27 | 50s        | 26.8 | Female | 85                      | 8        | 2               | 15               | 0            | 16            | YES          | 6.8             | 5.0           | 2            | 5            | 0            |
| Patient 28 | 50s        | 25.0 | Male   | 95                      | 21       | 11              | 20               | 0            | 21            | YES          | 7.7             | 4.8           | 2            | 0            | 0            |

|            |     |      |        |     |    |   |    |   |    |     |     |     |   |   |   |
|------------|-----|------|--------|-----|----|---|----|---|----|-----|-----|-----|---|---|---|
| Patient 29 | 50s | 29.0 | Male   | 78  | 31 | 4 | 4  | 0 | 38 | YES | 7.5 | 5.2 | 7 | 5 | 3 |
| Patient 30 | 50s | 29.7 | Female | 485 | 7  | 2 | 19 | 0 | 20 | NO  | 6.0 | 3.8 | 1 | 0 | 0 |

## eReferences

1. Weill D, Benden C, Corris PA, et al. A consensus document for the selection of lung transplant candidates: 2014--an update from the Pulmonary Transplantation Council of the International Society for Heart and Lung Transplantation. *J Heart Lung Transplant*. Jan 2015;34(1):1-15. doi:10.1016/j.healun.2014.06.014
2. Leard LE, Holm AM, Valapour M, et al. Consensus document for the selection of lung transplant candidates: An update from the International Society for Heart and Lung Transplantation. *The Journal of heart and lung transplantation : the official publication of the International Society for Heart Transplantation*. Nov 2021;40(11):1349-1379. doi:10.1016/j.healun.2021.07.005
3. Bharat A, Machuca TN, Querrey M, et al. Early outcomes after lung transplantation for severe COVID-19: a series of the first consecutive cases from four countries. *Lancet Respir Med*. May 2021;9(5):487-497. doi:10.1016/S2213-2600(21)00077-1
4. Tomasko J, Prasad SM, Dell DO, DeCamp MM, Bharat A. Therapeutic anticoagulation-free extracorporeal membrane oxygenation as a bridge to lung transplantation. *J Heart Lung Transplant*. Jul 2016;35(7):947-8. doi:10.1016/j.healun.2016.04.005
5. Kurihara C, Walter JM, Singer BD, et al. Extracorporeal Membrane Oxygenation Can Successfully Support Patients With Severe Acute Respiratory Distress Syndrome in Lieu of Mechanical Ventilation. *Crit Care Med*. Nov 2018;46(11):e1070-e1073. doi:10.1097/CCM.0000000000003354
6. Kurihara C, Walter JM, Karim A, et al. Feasibility of Venovenous Extracorporeal Membrane Oxygenation Without Systemic Anticoagulation. *Ann Thorac Surg*. Oct 2020;110(4):1209-1215. doi:10.1016/j.athoracsur.2020.02.011
